# Supplementary material
Source: publisher site journal article supplement (https://www.dovepress.com/article/354878)
Supplement: Supplementary file 1 [file get_supplementary_file.php]

**Supplementary material**


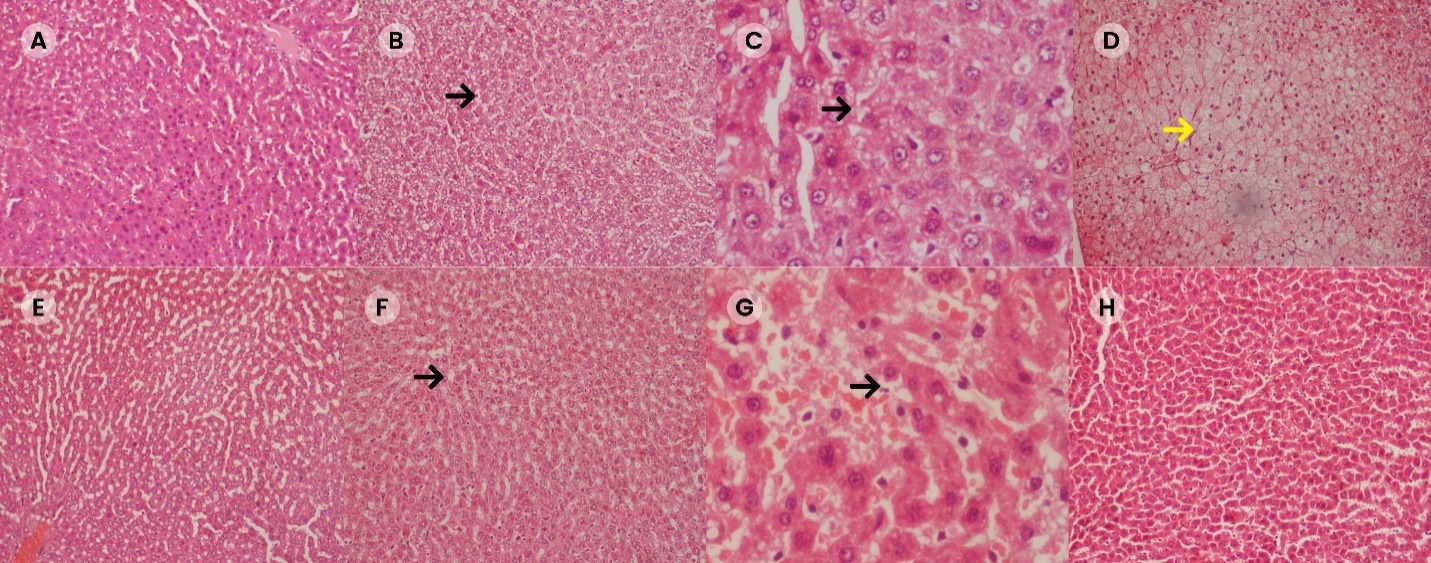


**Supplementary Figure S1:** Histology images of rat’s liver with macrovesicular and microvesicular steatosis, with some additional images of Figure 7 and high magnification, where black arrows shows the fat droplets and yellow arrow shows the ballooning (**A**) Liver of normal control group presenting normal hepatocytes (100x); (**B-D)** Liver of rat fed with HFD showing severe steatosis, fatty degeneration and ballooning of hepatocytes [100x(B&D) and 400x(C)]; (**E)** Liver of rat treated with standardbotanical mixture showing moderate fatty degeneration of hepatocytes (100x); (**F-G)** Liver sections of rats fed with HFD and treated with safranal 250 mg/kg/day showing moderate fatty degeneration of hepatocytes (100x-F and 400x-G); **(H)** Liver sections of rats fed with HFD and treated with safranal 500 mg/kg/day with mild fatty deposition (100x).
